# Supplementary material for: Protocol for a controlled human infection with genetically modified Neisseria lactamica expressing the meningococcal vaccine antigen NadA: a potent new technique for experimental medicine
Source: PubMed Central journal article supplement (PMC6501966; doi:10.1136/bmjopen-2018-026544), 2019-05-01
Supplement: bmjopen-2018-026544supp003.pdf [file bmjopen-2018-026544supp003.pdf]

## SUPPLEMENTARY TABLE 3 – STUDY TIMETABLE FOR CHALLENGE VOLUNTEERS

|                                                      | Screening | Pre challenge | Admission |     |     |     |     | Follow up |      |      |      |      |      |                      | Potential additional visits            |                                    |                                  |
|------------------------------------------------------|-----------|---------------|-----------|-----|-----|-----|-----|-----------|------|------|------|------|------|----------------------|----------------------------------------|------------------------------------|----------------------------------|
|                                                      |           |               | 0         | 1   | 2   | 3   | 4   | 7         | 10   | 14   | 28   | 56   | 90   | 92                   | Additional shedding check <sup>b</sup> | Triggered eradication <sup>c</sup> | Post triggered eradication check |
| Timeline (days)                                      | ≤ 90      | -5            | 0         | 1   | 2   | 3   | 4   | 7         | 10   | 14   | 28   | 56   | 90   | 92                   | 0 <sup>d</sup>                         | 0 <sup>d</sup>                     | 0 <sup>a</sup>                   |
| Day                                                  |           | W             | M         | Tu  | W   | Th  | F   | M         | Th   | M    | M    | M    |      |                      |                                        |                                    |                                  |
| Visit window                                         |           | +/-2          | 0         | 0   | 0   | 0   | 0   | +/-1      | +/-1 | +/-2 | +/-3 | +/-5 | +/-7 | -1 to 0 <sup>a</sup> |                                        |                                    |                                  |
| TOPS confirmation                                    | +         |               |           |     |     |     |     |           |      |      |      |      |      |                      |                                        |                                    |                                  |
| Volunteer Information Sheet                          | +         |               |           |     |     |     |     |           |      |      |      |      |      |                      |                                        |                                    |                                  |
| Informed consent                                     | +         |               |           |     |     |     |     |           |      |      |      |      |      |                      |                                        |                                    |                                  |
| Infection control training                           | +         |               |           |     |     |     | +   |           |      |      |      |      |      |                      |                                        |                                    |                                  |
| Vital signs                                          | +         | (+)           | +         | +   | +   | +   | +   | (+)       | (+)  | (+)  | (+)  | (+)  | (+)  | (+)                  | (+)                                    | (+)                                | (+)                              |
| Medical history                                      | +         |               |           |     |     |     |     |           |      |      |      |      |      |                      |                                        |                                    |                                  |
| Physical examination                                 | +         | (+)           | (+)       | (+) | (+) | (+) | (+) | (+)       | (+)  | (+)  | (+)  | (+)  | (+)  | (+)                  | (+)                                    | (+)                                | (+)                              |
| Pregnancy test (females)                             | +         |               | +         |     |     |     |     |           |      |      |      |      | +    |                      |                                        |                                    |                                  |
| Urinalysis                                           | +         |               |           |     |     |     |     |           |      |      |      |      |      |                      |                                        |                                    |                                  |
| Electrocardiogram                                    | +         |               |           |     |     |     |     |           |      |      |      |      |      |                      |                                        |                                    |                                  |
| Review eligibility                                   |           | +             | +         |     |     |     |     |           |      |      |      |      |      |                      |                                        |                                    |                                  |
| Inoculation                                          |           |               | +         |     |     |     |     |           |      |      |      |      |      |                      |                                        |                                    |                                  |
| Eradication                                          |           |               |           |     |     |     |     |           |      |      |      |      | +    |                      |                                        |                                    |                                  |
| Review of adverse events and concomitant medications |           | +             | +         | +   | +   | +   | +   | +         | +    | +    | +    | +    | +    | +                    | +                                      | +                                  | +                                |
| Throat swab 1                                        | +         | +             | +         |     | +   | +   | +   | +         | +    | +    | +    | +    | +    | +                    | +                                      | +                                  | +                                |
| Nasal wash                                           |           | +             |           |     |     | +   |     |           |      | +    | +    | +    | +    |                      |                                        |                                    |                                  |
| Throat swab 2 (microbiome)                           |           |               | +         |     |     | +   |     | +         | +    | +    | +    | +    | +    |                      |                                        |                                    |                                  |
| Nasosorption test                                    |           |               | +         |     |     | +   |     |           |      | +    | +    | +    | +    |                      |                                        |                                    |                                  |
| Saliva sample                                        |           |               | +         |     |     | +   |     |           |      | +    | +    | +    | +    |                      |                                        |                                    |                                  |
| Environmental samples                                |           |               |           | +   | +   | +   | +   | +         | +    | +    | +    | +    | +    |                      |                                        |                                    |                                  |
| Safety bloods                                        | 8         |               | 8         |     |     | 8   |     | 8         |      | 8    | 8    | 8    | 8    |                      |                                        |                                    |                                  |
| Immunological blood tests                            |           |               | 70        |     |     |     |     | 70        |      | 70   | 70   | 70   | 70   |                      |                                        |                                    |                                  |
| Cumulative blood volume                              | 8         |               | 86        |     |     | 94  |     | 172       |      | 250  | 328  | 406  | 484  |                      |                                        |                                    |                                  |

(+) If clinically indicated, <sup>a</sup>1-2 days after eradication, <sup>b</sup>If increased shedding seen at one timepoint from Day 14, <sup>c</sup>If early eradication triggered (see section 9.5.3), <sup>d</sup>As soon as possible after triggering results are known.
