# Supplementary material for: Protocol for a controlled human infection with genetically modified Neisseria lactamica expressing the meningococcal vaccine antigen NadA: a potent new technique for experimental medicine
Source: PubMed Central journal article supplement (PMC6501966; doi:10.1136/bmjopen-2018-026544), 2019-05-01
Supplement: bmjopen-2018-026544supp004.pdf [file bmjopen-2018-026544supp004.pdf]

## SUPPLEMENTARY TABLE 4 – STUDY TIMETABLE FOR CONTACT VOLUNTEERS

|                                                      | Screening | Challenge volunteer discharge | Follow up |      |      |                   |                      | Potential additional visits                |                                     |
|------------------------------------------------------|-----------|-------------------------------|-----------|------|------|-------------------|----------------------|--------------------------------------------|-------------------------------------|
|                                                      |           |                               | 14        | 28   | 56   | 90                | 92                   | Early / triggered eradication <sup>c</sup> | Early / triggered eradication check |
| Timeline (days)                                      | ≤ 90      | 4                             | 14        | 28   | 56   | 90                | 92                   |                                            |                                     |
| Day                                                  |           | F                             | M         | M    | M    | +/-7 <sup>a</sup> | -1 to 0 <sup>c</sup> |                                            |                                     |
| Visit window                                         |           | 0                             | +/-2      | +/-3 | +/-5 |                   |                      | 0 <sup>d</sup>                             | -1 to 0 <sup>b</sup>                |
| TOPS confirmation                                    | +         |                               |           |      |      |                   |                      |                                            |                                     |
| Volunteer Information Sheet                          | +         |                               |           |      |      |                   |                      |                                            |                                     |
| Informed consent                                     | +         |                               |           |      |      |                   |                      |                                            |                                     |
| Reconfirm eligibility                                |           | +                             |           |      |      |                   |                      |                                            |                                     |
| Infection control training                           | +         | +                             |           |      |      |                   |                      |                                            |                                     |
| Vital signs                                          | +         |                               | (+)       | (+)  | (+)  | (+)               | (+)                  | (+)                                        | (+)                                 |
| Medical history                                      | +         |                               |           |      |      |                   |                      |                                            |                                     |
| Physical examination                                 | +         |                               | (+)       | (+)  | (+)  | (+)               | (+)                  | (+)                                        | (+)                                 |
| Pregnancy test (females only)                        | +         | +                             |           |      |      | +                 |                      | +                                          |                                     |
| Urinalysis                                           | +         |                               |           |      |      |                   |                      |                                            |                                     |
| Electrocardiogram                                    | +         |                               |           |      |      |                   |                      |                                            |                                     |
| Eradication                                          |           |                               |           |      |      | +                 |                      | +                                          |                                     |
| Review of adverse events and concomitant medications |           |                               | +         | +    | +    | +                 | +                    | +                                          | +                                   |
| Throat swab                                          | +         | +                             | +         | +    | +    | +                 | +                    | +                                          | +                                   |

(+) If clinically indicated, <sup>a</sup>Same day as corresponding challenge volunteer, <sup>b</sup>1-2 days after eradication, <sup>c</sup>If early eradication triggered, <sup>d</sup>As soon as possible after triggering results are known
